# Supplementary material
Source: Springer Nature journal article supplement (https://www.springermedizin.de/resource/supplementary/12916_2014_987_MOESM8_ESM.pdf/9598962)

**Supplemental Figure 7. PFS as extracted from Kaplan Meier curves by individual randomized controlled trials included by study**

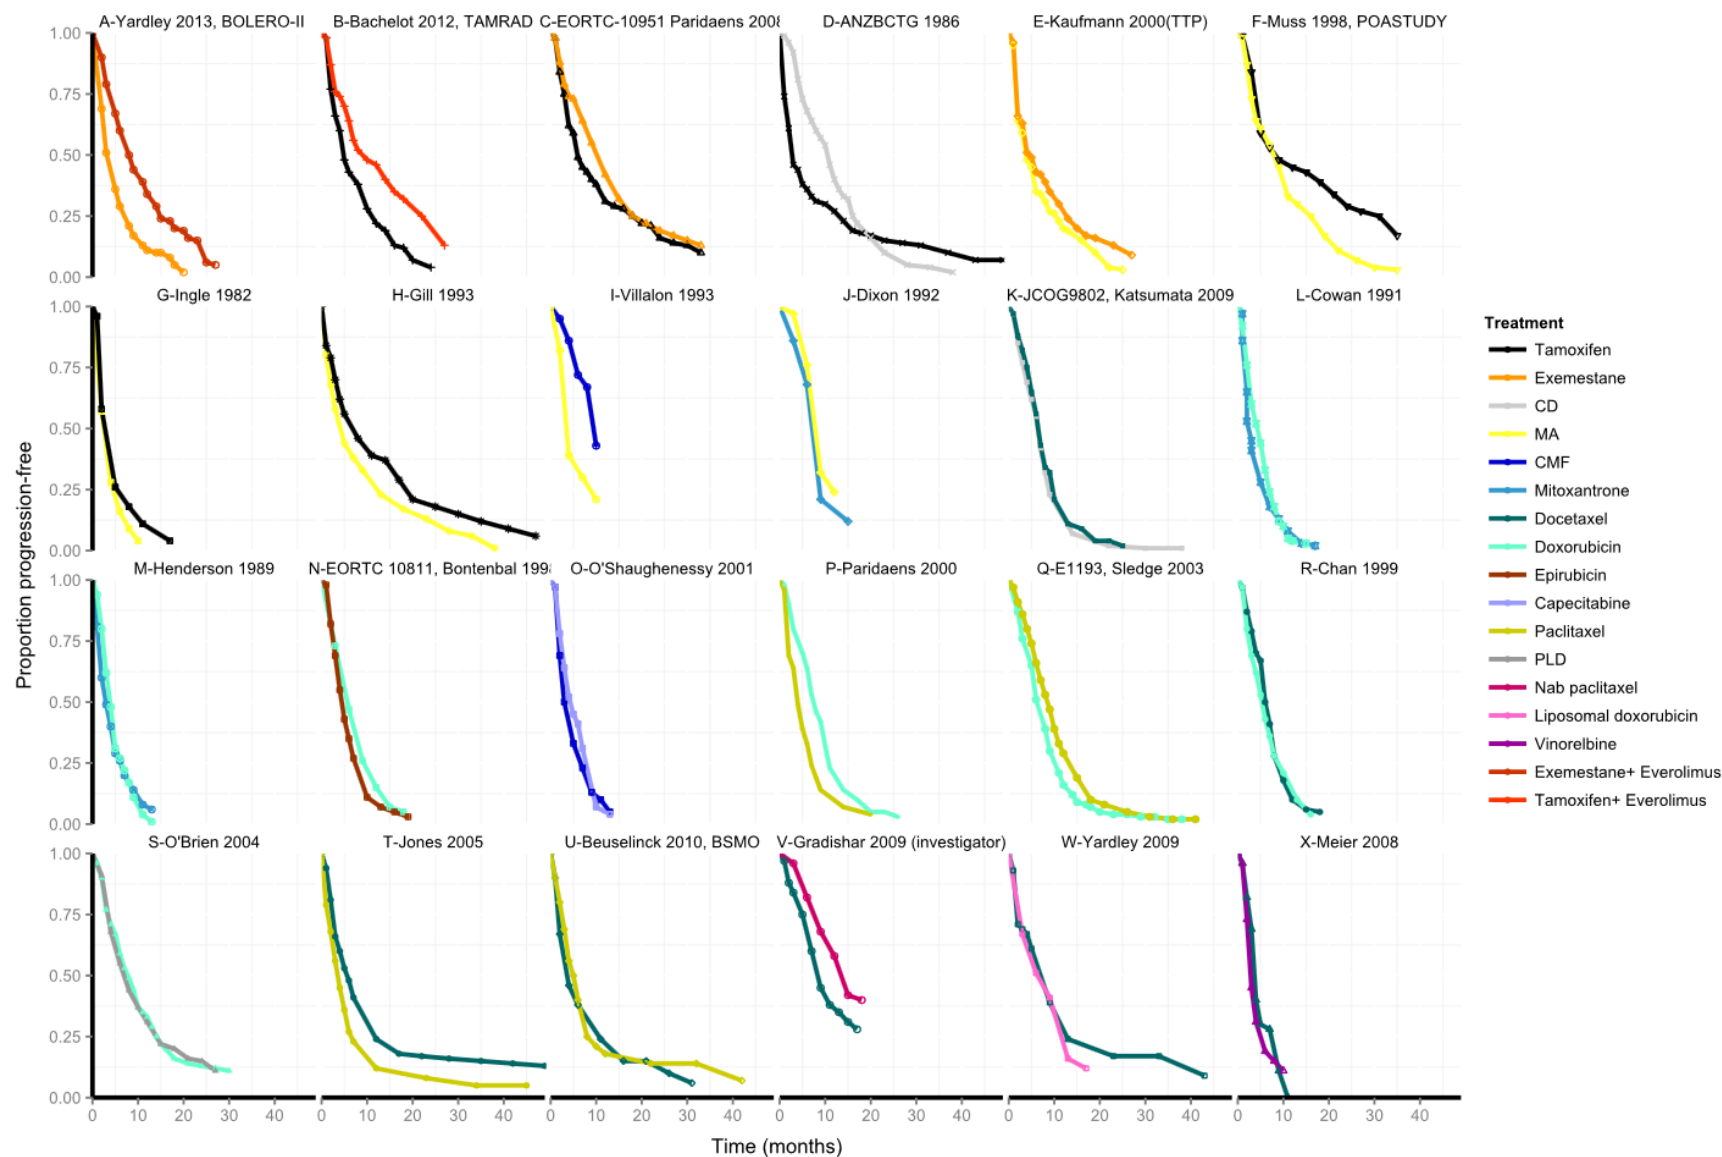

Supplement: MOESM8 [file 9598962]
